## CORRECTION

# Correction: Low-resolution vision in a velvet worm (Onychophora) (doi: 10.1242/jeb.175802)

**John D. Kirwan, Josefine Graf, Jochen Smolka, Georg Mayer, Miriam J. Henze and Dan-Eric Nilsson**

There was an error published in *Journal of Experimental Biology* (2018) **221**, jeb175802 (doi: 10.1242/jeb.175802).

In Materials and Methods, ‘Object taxis’, the final sentence should read: ‘An animal contributed only one trial to each experiment except for the two smaller bar targets, for which individuals were assessed up to four times.’

In addition, there were typing errors in the ‘Individual’ column (rows 89, 90 and 91) and ‘Target arc angle’ column (row 248) in Table S2; these values have been corrected.

None of the changes affects the conclusions of the paper. The authors apologise for any inconvenience this may have caused.
